# Supplementary material for: Fast and efficient one step synthesis of dienamides
Source: Royal Society of Chemistry journal article supplement (doi:10.1039/b901797f), 2009-01-01

## Fast and Efficient One Step Synthesis of Dienamides.

Jennifer E. Mathieson,<sup>a</sup> James J. Crawford,<sup>b</sup> Marc Schmidtmann,<sup>a∞</sup>  
and Rodolfo Marquez.<sup>a,\*†</sup>

*a) WestCHEM, University of Glasgow, Joseph Black Building, University Avenue, Glasgow, G12 8QQ. b) Department of Medicinal Chemistry, AstraZeneca R&D, Charnwood, Bakewell Rd. Loughborough, LE11 5RH, United Kingdom.*

*r.marquez@chem.gla.ac.uk*

Spectral data

---

<sup>∞</sup> Author to whom crystallographic data questions should be addressed.

<sup>†</sup> Ian Sword Lecturer of Organic Chemistry.

**(2E,4Z) Methyl 5-((R)-2,2,5,5-tetramethyl-1,3-dioxane-4-carboxamido)penta-2,4-dienoate, 15.**

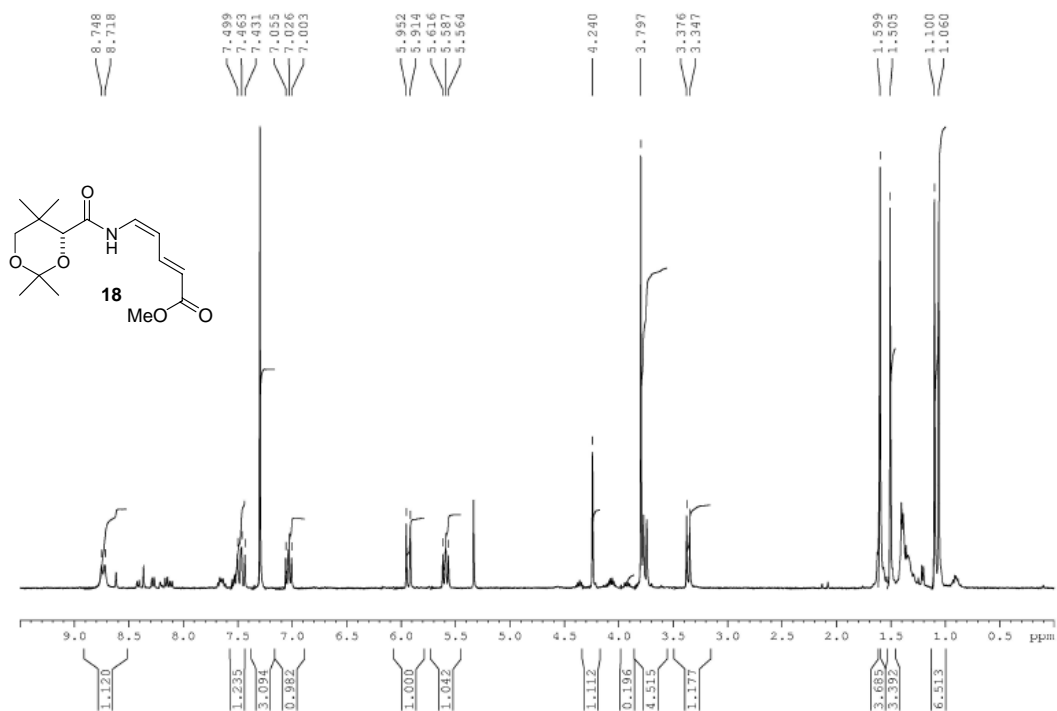

**(2E,4Z) Methyl 5-(2-oxopyrrolidin-1-yl)penta-2,4-dienoate, 23.**

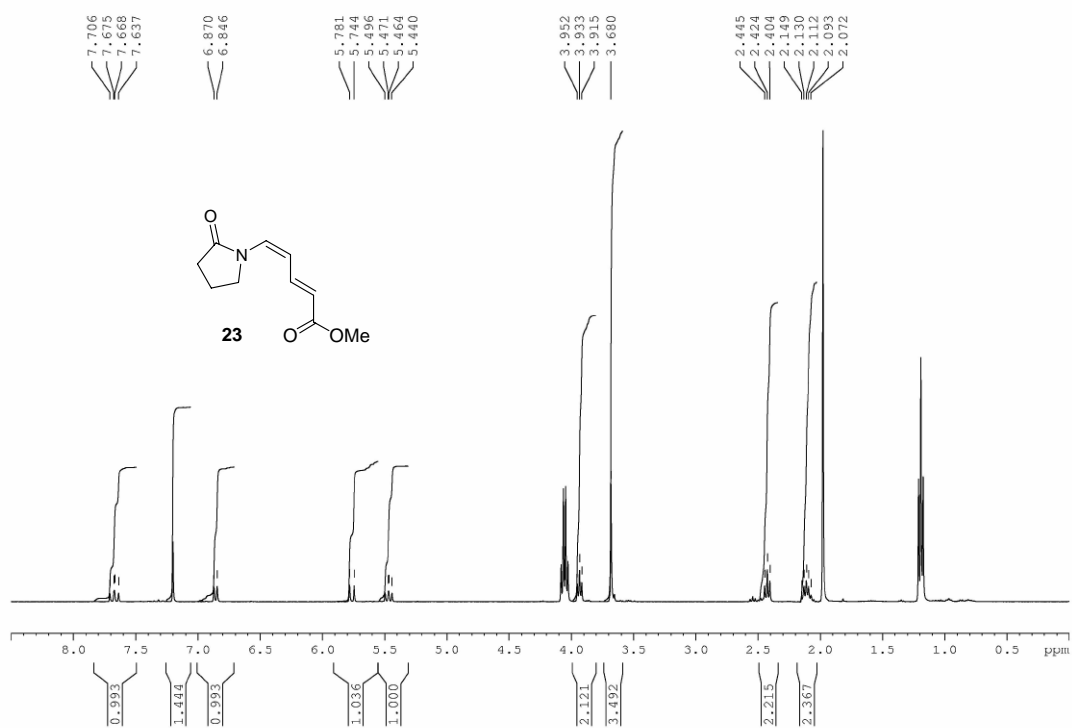

**(2*E*,4*Z*) Methyl 5-(2-oxopiperidin-1-yl)penta-2,4-dienoate, 24*Z,E*; and (2*E*,4*E*)  
Methyl 5-(2-oxopiperidin-1-yl)penta-2,4-dienoate, 24*E,E*.**

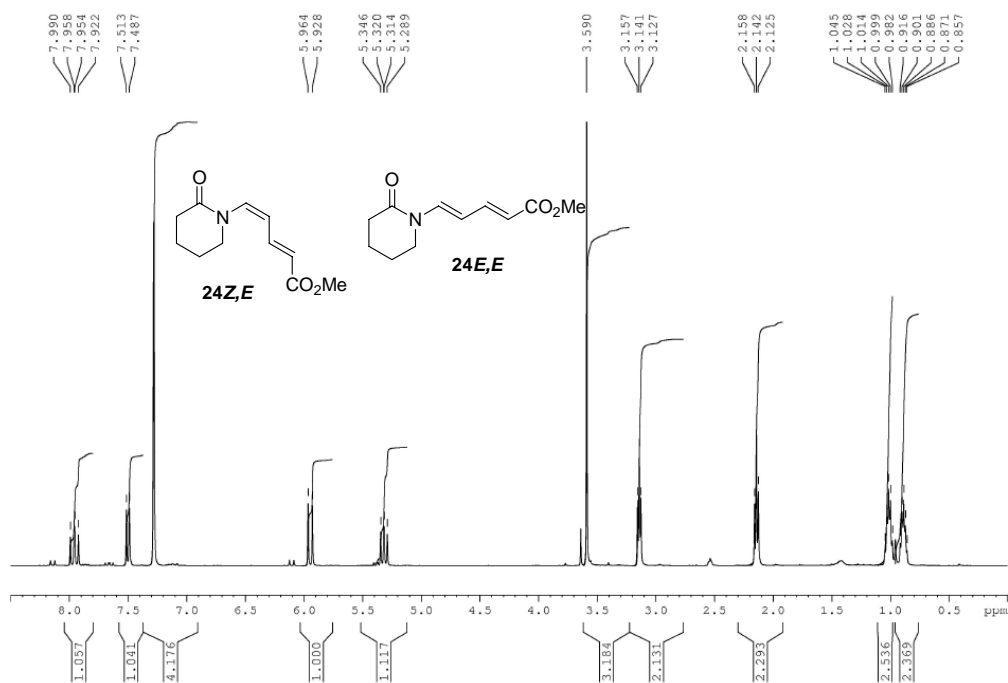

**(2*E*,4*Z*) Methyl 5-(2-oxoazepan-1-yl)penta-2,4-dienoate, 25*Z,E*; and (2*E*,4*E*)  
Methyl 5-(2-oxoazepan-1-yl)penta-2,4-dienoate, 25*E,E*.**

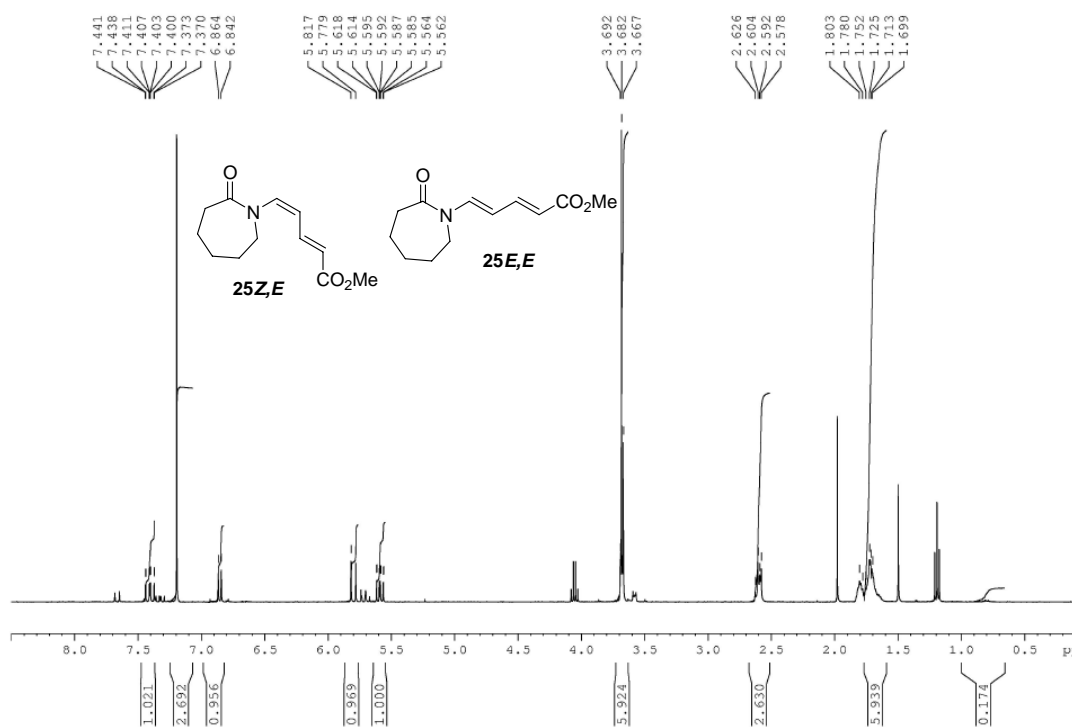

**(2E,4Z) Methyl 5-benzamidopenta-2,4-dienoate, 26Z,E**

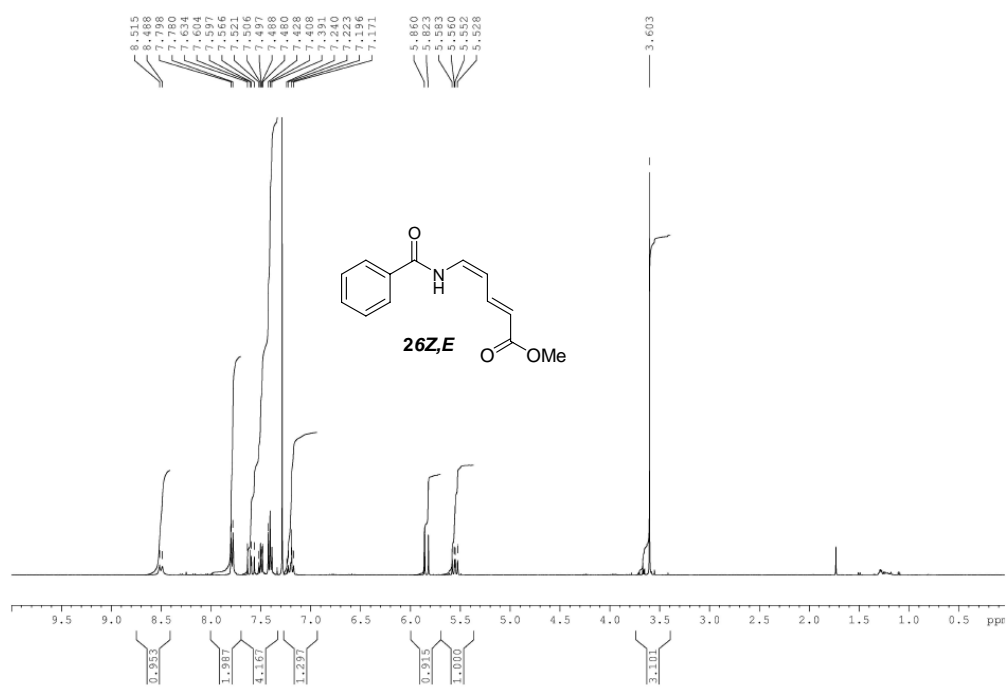

**(2E,4E) Methyl 5-benzamidopenta-2,4-dienoate, 26E,E**

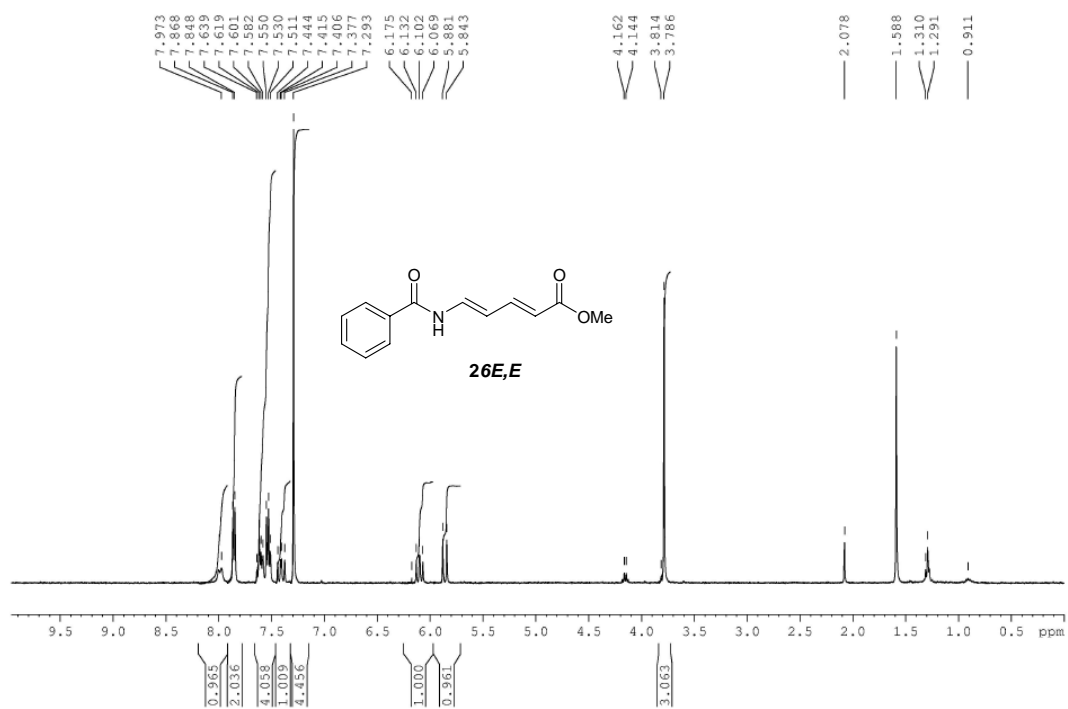

**(2E,4Z) Methyl 5-(picolinamido)penta-2,4-dienoate, 27Z,E; and (2E,4E) Methyl 5-(picolinamido)penta-2,4-dienoate, 27E,E.**

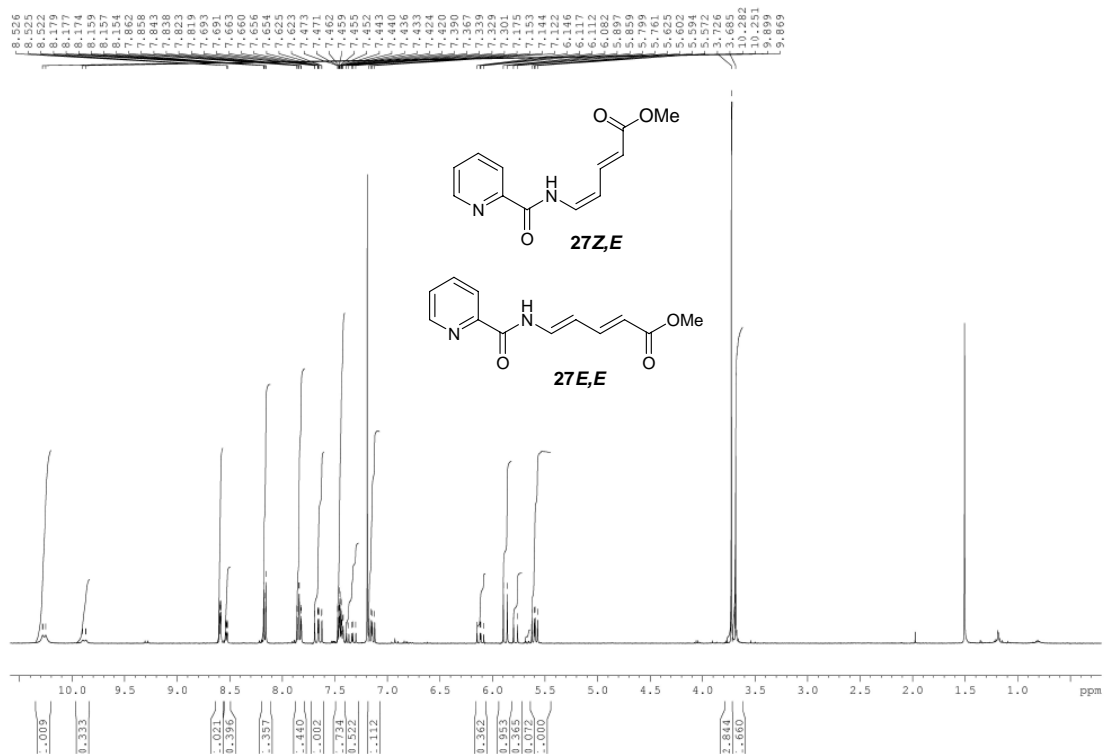

**(2E,4Z) Methyl 5-(3-methylbut-2-enamido)penta-2,4-dienoate, 28.**

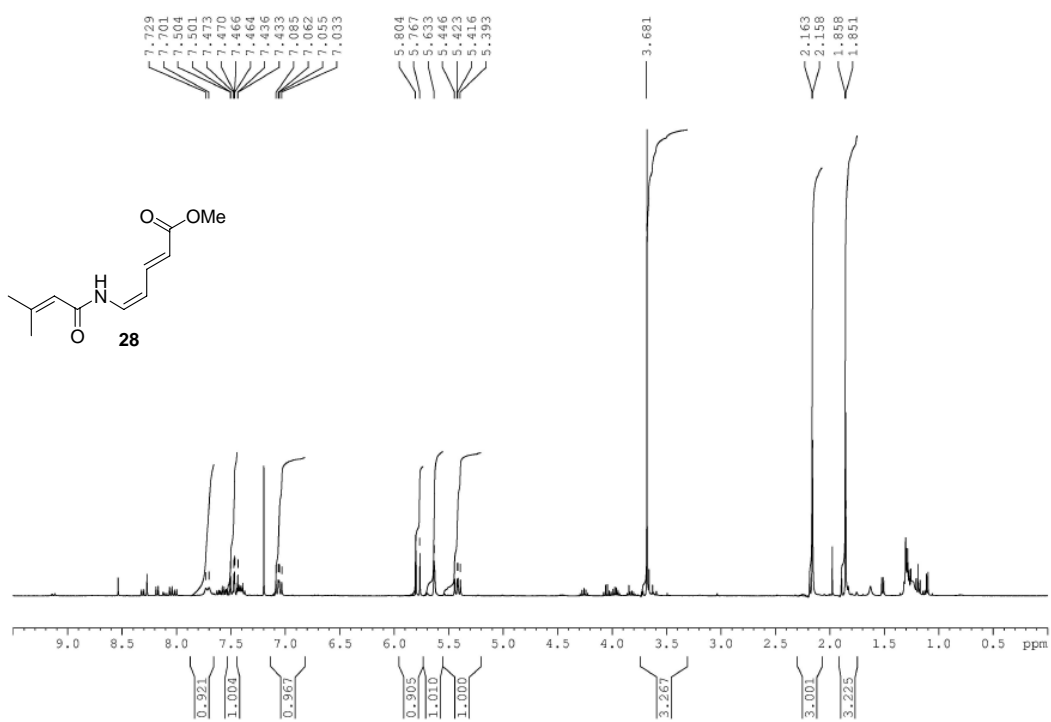

**(2E,4Z) Methyl 5-butyramidopenta-2,4-dienoate, 29**

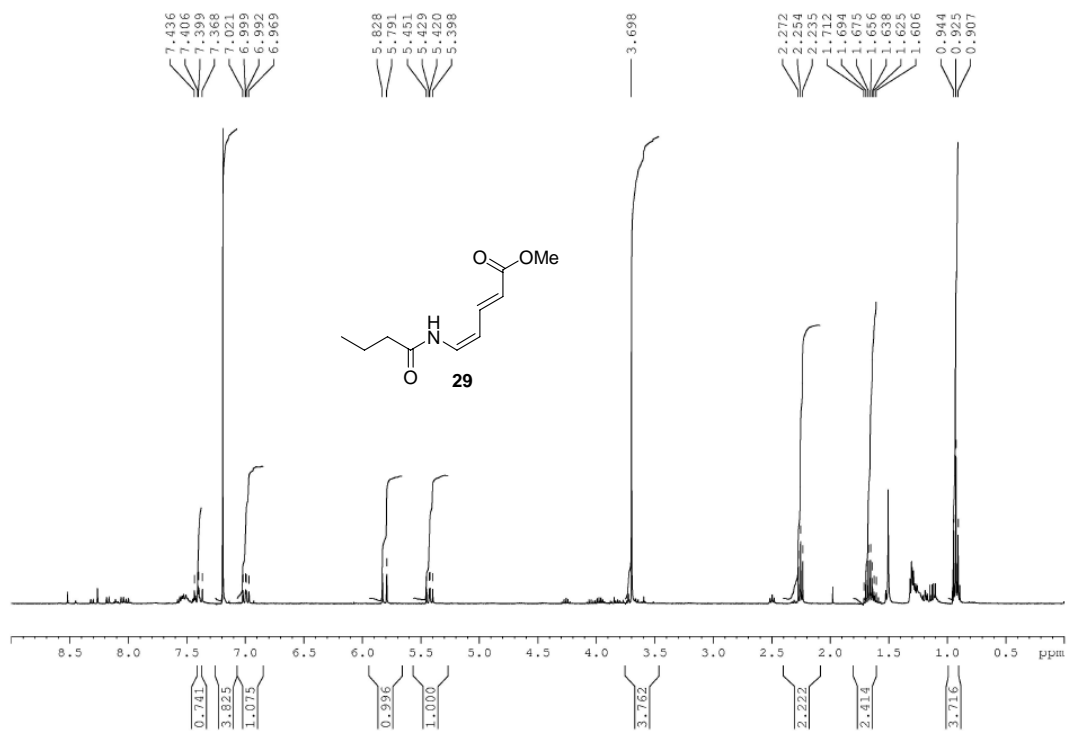

Supplement: b901797f.pdf [file b901797f.pdf]
